# Supplementary material for: Single and Combinative Impacts of Healthy Eating Behavior and Physical Activity on COVID-19-like Symptoms among Outpatients: A Multi-Hospital and Health Center Survey
Source: Nutrients. 2021 Sep 18;13(9):3258. doi: 10.3390/nu13093258 (PMC8465237; doi:10.3390/nu13093258)
Supplement: Supplementary file 1 [file nutrients-13-03258-s001.zip › nutrients-1332353-SI.pdf]

# Single and Combinative Impacts of Healthy Eating Behavior and Physical Activity on Symptoms like COVID-19 among Outpatients: A Multi-Hospital and Health Center Survey

## Supplemental Material

|                                                                                                                                                                                         |   |
|-----------------------------------------------------------------------------------------------------------------------------------------------------------------------------------------|---|
| <b>Table S1.</b> Confounders associated with suspected COVID-19 symptoms among outpatients (n= 3947). .....                                                                             | 2 |
| <b>Table S2.</b> Spearman's correlation ( $\rho$ ) among potential confounders (n= 3947). .....                                                                                         | 3 |
| <b>Table S3.</b> Associations of underlying diseases with healthy eating behavior and physical activity among outpatients using multiple logistic regression analysis (N = 3947). ..... | 4 |

**Table S1.** Confounders associated with suspected COVID-19 symptoms among outpatients (n= 3947).

| Variables                              | Bivariate model   |                |
|----------------------------------------|-------------------|----------------|
|                                        | OR (95% CI)       | <i>p</i> Value |
| Age groups                             |                   |                |
| 18-59                                  | 1.00              |                |
| 60-85                                  | 2.06 (1.77, 2.40) | <0.001         |
| Gender                                 |                   |                |
| Female                                 | 1.00              |                |
| Male                                   | 1.02 (0.89, 1.16) | 0.762          |
| Marital status                         |                   |                |
| Single                                 | 1.00              |                |
| Married                                | 1.81 (1.52, 2.15) | <0.001         |
| Separated/Divorced/Widowed             | 3.37 (2.48, 4.58) | <0.001         |
| Education levels                       |                   |                |
| Junior high school or below            | 1.00              |                |
| Senior high school                     | 0.61 (0.52, 0.73) | <0.001         |
| College/university/postgraduate degree | 0.73 (0.63, 0.85) | <0.001         |
| Occupational status                    |                   |                |
| No job                                 | 1.00              |                |
| Have a job                             | 1.19 (1.04, 1.36) | 0.010          |
| Ability to pay for healthcare          |                   |                |
| Very or fairly difficult               | 1.00              |                |
| Very or fairly easy                    | 0.44 (0.39, 0.51) | <0.001         |
| Social status                          |                   |                |
| Low                                    | 1.00              |                |
| Middle or high                         | 0.62 (0.51, 0.75) | <0.001         |
| BMI, kg/m <sup>2</sup>                 |                   |                |
| Underweight (BMI < 18.5)               | 1.28 (1.03, 1.59) | 0.024          |
| Normal weight (18.5 ≤ BMI < 25.0)      | 1.00              |                |
| Overweight/obese (BMI ≥ 25.0)          | 0.61 (0.48, 0.77) | <0.001         |
| Underlying diseases                    |                   |                |
| No                                     | 1.00              |                |
| Yes                                    | 0.99 (0.83, 1.19) | 0.936          |
| Smoking                                |                   |                |
| No                                     | 1.00              |                |
| Yes                                    | 1.06 (0.86, 1.29) | 0.580          |
| Drinking alcohol                       |                   |                |
| No                                     | 1.00              |                |
| Yes                                    | 0.90 (0.78, 1.04) | 0.140          |
| Health literacy, 1-score increment     | 0.95 (0.94, 0.96) | <0.001         |

Abbreviations: OR, odds ratio; BMI, Body Mass Index.

**Table S2.** Spearman's correlation (rho) among potential confounders (n= 3947).

| Variables           | Age  | Gender     | Marital status | Education  | Occupation | Ability to pay | Social status | Underlying diseases | BMI  | Smoking    | Drinking | HES | Physical activity |
|---------------------|------|------------|----------------|------------|------------|----------------|---------------|---------------------|------|------------|----------|-----|-------------------|
| Gender              | -.00 |            |                |            |            |                |               |                     |      |            |          |     |                   |
| Marital status      | .31  | -.11       |                |            |            |                |               |                     |      |            |          |     |                   |
| Education           | -.29 | .07        | <b>-.32</b>    |            |            |                |               |                     |      |            |          |     |                   |
| Occupation          | -.23 | .13        | .07            | .07        |            |                |               |                     |      |            |          |     |                   |
| Ability to pay      | -.16 | -.01       | -.11           | .15        | .06        |                |               |                     |      |            |          |     |                   |
| Social status       | -.15 | .04        | -.08           | .19        | .02        | .24            |               |                     |      |            |          |     |                   |
| Underlying diseases | .29  | -.01       | .15            | -.14       | -.13       | -.05           | -.03          |                     |      |            |          |     |                   |
| BMI                 | .04  | .07        | 0.1            | -.00       | .04        | .02            | .06           | .06                 |      |            |          |     |                   |
| Smoking             | -.01 | <b>.35</b> | .02            | -.07       | .13        | -.04           | -.00          | -.00                | .07  |            |          |     |                   |
| Drinking            | -.11 | <b>.44</b> | -.09           | .11        | .14        | .01            | .02           | -.04                | .04  | <b>.36</b> |          |     |                   |
| HES                 | .00  | -.03       | -.04           | .09        | -.04       | .07            | .02           | .00                 | -.02 | -.09       | -.11     |     |                   |
| Physical activity   | -.19 | .03        | -.08           | .12        | .04        | .07            | .04           | -.07                | -.01 | -.03       | .05      | .05 |                   |
| Health literacy     | -.29 | .08        | -.24           | <b>.32</b> | .06        | .26            | .24           | -.15                | .00  | -.00       | .04      | .07 | .08               |

Abbreviations: HES, healthy eating score; BMI, Body Mass Index.

**Table S3.** Associations of underlying diseases with healthy eating behavior and physical activity among outpatients using multiple logistic regression analysis (N = 3947).

| Variables                              | Healthy Eating Behavior * |          |                          |              | Physical activity** |          |                          |              |
|----------------------------------------|---------------------------|----------|--------------------------|--------------|---------------------|----------|--------------------------|--------------|
|                                        | OR (95% CI)               | <i>p</i> | OR (95% CI)              | <i>p</i>     | OR (95% CI)         | <i>p</i> |                          |              |
| <b>Underlying diseases</b>             |                           |          |                          |              |                     |          |                          |              |
| <b>No</b>                              | Ref.                      |          | <b>Ref.</b>              |              | Ref.                |          | <b>Ref.</b>              |              |
| <b>Yes</b>                             | 1.17 (0.95, 1.45)         | 0.129    | <b>1.14 (0.91, 1.42)</b> | <b>0.251</b> | 0.67 (0.56, 0.81)   | <0.001   | <b>0.94 (0.76, 1.14)</b> | <b>0.516</b> |
| Age groups                             |                           |          |                          |              |                     |          |                          |              |
| 18-59                                  | Ref.                      |          | Ref.                     |              | Ref.                |          | Ref.                     |              |
| 60-85                                  | 1.19 (0.99, 1.43)         | 0.052    | 1.21 (0.99, 1.50)        | 0.066        | 0.40 (0.34, 0.47)   | <0.001   | 0.48 (0.40, 0.57)        | <0.001       |
| Gender                                 |                           |          |                          |              |                     |          |                          |              |
| Female                                 | Ref.                      |          | Ref.                     |              | Ref.                |          | Ref.                     |              |
| Male                                   | 1.00 (0.86, 1.17)         | 0.966    | 1.01 (0.85, 1.19)        | 0.926        | 1.17 (1.02, 1.35)   | 0.027    | 1.11 (0.94, 1.30)        | 0.223        |
| Marital status                         |                           |          |                          |              |                     |          |                          |              |
| Single                                 | Ref.                      |          | -                        | -            | Ref.                |          | -                        | -            |
| Married                                | 0.81 (0.68, 0.97)         | 0.025    | -                        | -            | 0.77 (0.64, 0.91)   | 0.003    | -                        | -            |
| Separated/Divorced/Widowed             | 1.46 (1.01, 2.10)         | 0.044    | -                        | -            | 0.43 (0.32, 0.59)   | <0.001   | -                        | -            |
| Education levels                       |                           |          |                          |              |                     |          |                          |              |
| Junior high school or below            | Ref.                      |          | Ref.                     |              | Ref.                |          | Ref.                     |              |
| Senior high school                     | 1.05 (0.85, 1.29)         | 0.636    | 1.18 (0.95, 1.47)        | 0.128        | 1.54 (1.28, 1.83)   | <0.001   | 1.20 (0.99, 1.45)        | 0.062        |
| College/university/postgraduate degree | 1.46 (1.21, 1.75)         | <0.001   | 1.73 (1.41, 2.12)        | <0.001       | 2.01 (1.71, 2.38)   | <0.001   | 1.47 (1.22, 1.76)        | <0.001       |
| Occupational status                    |                           |          |                          |              |                     |          |                          |              |
| No job                                 | Ref.                      |          | Ref.                     |              | Ref.                |          | Ref.                     |              |
| Have a job                             | 0.81 (0.69, 0.95)         | 0.008    | 0.84 (0.71, 0.99)        | 0.037        | 1.19 (1.04, 1.37)   | 0.014    | 0.96 (0.83, 1.12)        | 0.626        |
| Ability to pay for healthcare          |                           |          |                          |              |                     |          |                          |              |
| Very or fairly difficult               | Ref.                      |          | Ref.                     |              | Ref.                |          | Ref.                     |              |
| Very or fairly easy                    | 0.86 (0.74, 1.01)         | 0.057    | 0.90 (0.77, 1.06)        | 0.221        | 1.46 (1.27, 1.68)   | <0.001   | 1.25 (1.07, 1.45)        | 0.004        |
| Social status                          |                           |          |                          |              |                     |          |                          |              |
| Low                                    | Ref.                      |          | Ref.                     |              | Ref.                |          | Ref.                     |              |
| Middle or high                         | 0.74 (0.58, 0.94)         | 0.013    | 0.71 (0.55, 0.91)        | 0.007        | 1.43 (1.17, 1.75)   | 0.001    | 1.05 (0.84, 1.30)        | 0.683        |

|                                    |                   |       |                   |       |                   |        |                   |       |
|------------------------------------|-------------------|-------|-------------------|-------|-------------------|--------|-------------------|-------|
| BMI, kg/m2                         |                   |       |                   |       |                   |        |                   |       |
| Underweight (BMI < 18.5)           | 1.19 (0.92, 1.53) | 0.178 | 1.19 (0.92, 1.55) | 0.176 | 0.99 (0.78, 1.25) | 0.935  | 0.98 (0.76, 1.25) | 0.86  |
| Normal weight (18.5 ≤ BMI < 25.0)  | Ref.              |       | Ref.              |       | Ref.              |        | Ref.              |       |
| Overweight/obese (BMI ≥ 25.0)      | 1.12 (0.87, 1.43) | 0.384 | 1.14 (0.88, 1.46) | 0.329 | 0.85 (0.68, 1.06) | 0.156  | 0.88 (0.69, 1.10) | 0.266 |
| Smoking                            |                   |       |                   |       |                   |        |                   |       |
| No                                 | Ref.              |       | Ref.              |       | Ref.              |        | -                 | -     |
| Yes                                | 0.81 (0.63, 1.05) | 0.116 | 0.89 (0.68, 1.19) | 0.446 | 0.85 (0.69, 1.05) | 0.140  | -                 | -     |
| Drinking alcohol                   |                   |       |                   |       |                   |        |                   |       |
| No                                 | Ref.              |       | -                 | -     | Ref.              |        | Ref.              |       |
| Yes                                | 0.91 (0.77, 1.08) | 0.271 | -                 | -     | 1.32 (1.14, 1.54) | <0.001 | 1.12 (0.94, 1.34) | 0.220 |
| Health literacy, 1-score increment | 1.01 (0.99, 1.02) | 0.183 | -                 | -     | 1.03 (1.02, 1.04) | <0.001 | -                 | -     |

\* The reference group is 'low HES', the test group is 'medium or high HES'.

\*\* The reference group is 'physical inactivity', the test group is 'active physical activity'.
